# Supplementary material for: A Prognostic Model Based on Residual Cancer Burden and Tumor-Infiltrating Lymphocytes on Residual Disease after Neoadjuvant Therapy in HER2+ Breast Cancer
Source: PubMed Central journal article supplement — Clin Cancer Res. 2023 Jul 7;29(17):3429–37. doi: 10.1158/1078-0432.CCR-23-0480 (PMC10472099; doi:10.1158/1078-0432.ccr-23-0480), 2023-07-07

**Supplementary Figure 1 Kaplan–Meier curves of overall survival according to RCB classes and RD-TILs.**

Kaplan Meier curve for overall survival according to the integrated evaluation of RCB and RD-TILs in patients with RCB class II and RCB class III.

Abbreviations: RCB, residual cancer burden; TIL, tumor infiltrating lymphocytes on residual disease; HR, hazard ratio; CI, confidence interval.

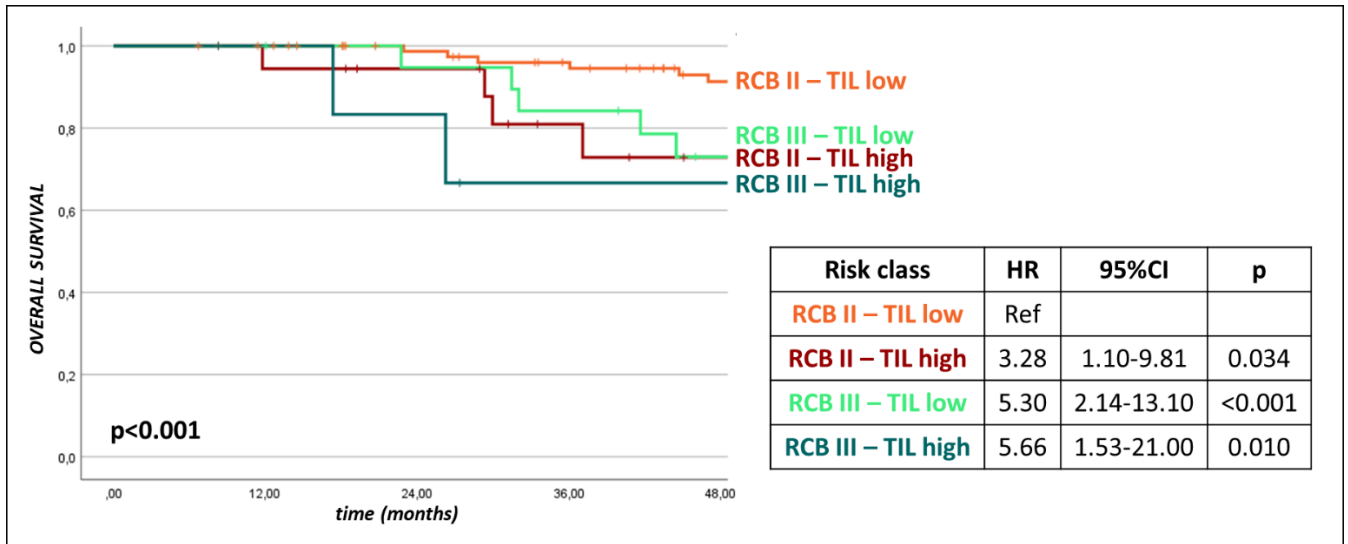

Supplement: ccr-23-0480_supplementary_figure_1_suppsf1.pdf [file ccr-23-0480_supplementary_figure_1_suppsf1.pdf]
