# Supplementary material for: A Prognostic Model Based on Residual Cancer Burden and Tumor-Infiltrating Lymphocytes on Residual Disease after Neoadjuvant Therapy in HER2+ Breast Cancer
Source: PubMed Central journal article supplement — Clin Cancer Res. 2023 Jul 7;29(17):3429–37. doi: 10.1158/1078-0432.CCR-23-0480 (PMC10472099; doi:10.1158/1078-0432.ccr-23-0480), 2023-07-07

**Supplementary Figure 2** – Association between baseline TILs and pCR in: 2a) the overall cohort and 2b) the cohort of patients receiving taxane-only neoadjuvant chemotherapy (plus anti-HER2 treatment).

Association between levels of RD-TILs and the likelihood of achieving pCR in the overall population (2a) and in the subgroup of patients receiving taxane-only chemotherapy as backbone for anti-HER2 treatment (2b).

Abbreviations: TILs, tumor infiltrating lymphocytes; NACT, neoadjuvant chemotherapy; pCR, pathologic complete response; RD, residual disease.

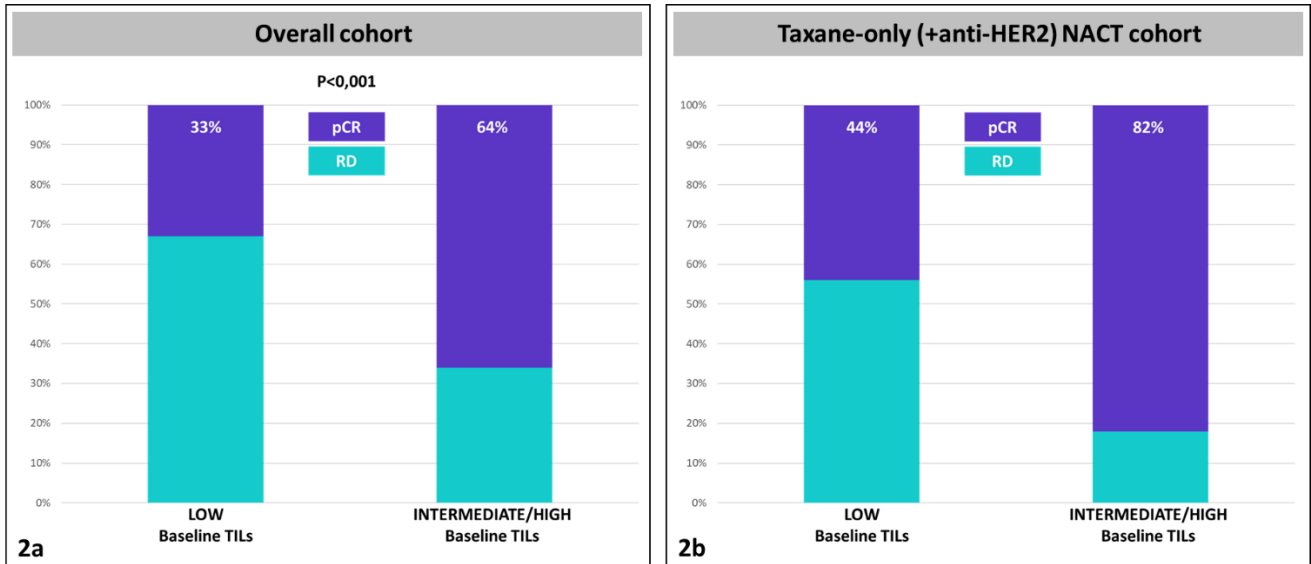

Supplement: ccr-23-0480_supplementary_figure_2_suppsf2.pdf [file ccr-23-0480_supplementary_figure_2_suppsf2.pdf]
