# Supplementary material for: A Prognostic Model Based on Residual Cancer Burden and Tumor-Infiltrating Lymphocytes on Residual Disease after Neoadjuvant Therapy in HER2+ Breast Cancer
Source: PubMed Central journal article supplement — Clin Cancer Res. 2023 Jul 7;29(17):3429–37. doi: 10.1158/1078-0432.CCR-23-0480 (PMC10472099; doi:10.1158/1078-0432.ccr-23-0480), 2023-07-07

**Supplementary Figure 3** – Matched evaluation of baseline TIL (b-TILs) and residual (RD-TILs) in the overall RD cohort (Fig. 3a), the high RD-TILs cohort (Fig. 3b) and in the low RD-TILs cohort (Fig. 3c).

Evaluation of baseline tumor infiltrating lymphocytes and matched residual disease tumor infiltrating lymphocytes in the overall cohort (3a), in the cohort of patients showing high levels of tumor infiltrating lymphocytes on residual disease (3b) and in the cohort of patients showing low levels tumor infiltrating lymphocytes on residual disease (3c).

Abbreviations: RD, residual disease; TILs, tumor infiltrating lymphocytes

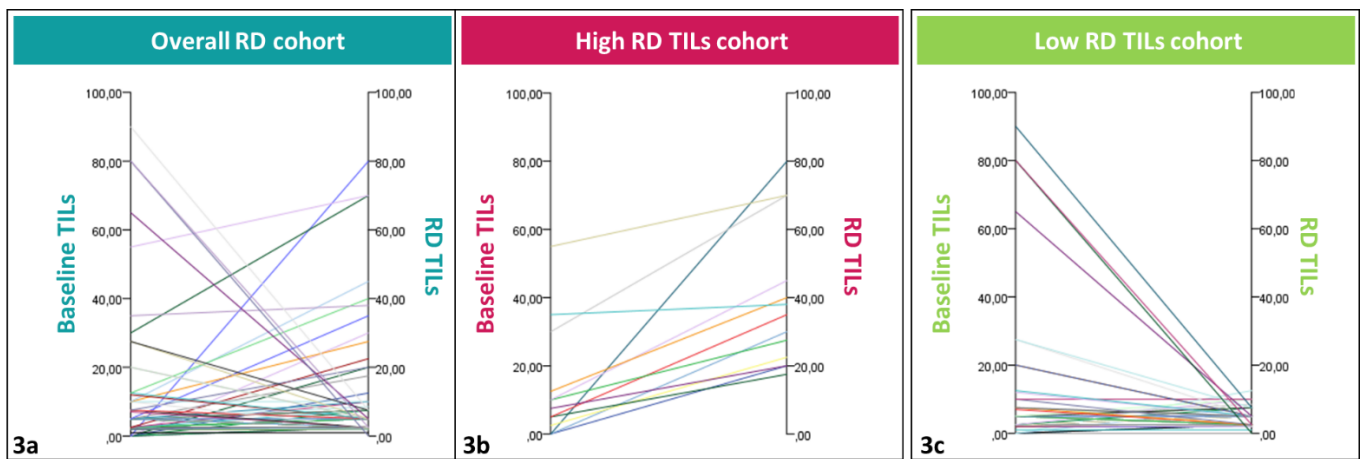

Supplement: ccr-23-0480_supplementary_figure_3_suppsf3.pdf [file ccr-23-0480_supplementary_figure_3_suppsf3.pdf]
