# Supplementary material for: A Prognostic Model Based on Residual Cancer Burden and Tumor-Infiltrating Lymphocytes on Residual Disease after Neoadjuvant Therapy in HER2+ Breast Cancer
Source: PubMed Central journal article supplement — Clin Cancer Res. 2023 Jul 7;29(17):3429–37. doi: 10.1158/1078-0432.CCR-23-0480 (PMC10472099; doi:10.1158/1078-0432.ccr-23-0480), 2023-07-07
Supplement: ccr-23-0480_supplementary_table_1_suppst1.pdf [file ccr-23-0480_supplementary_table_1_suppst1.pdf]

**Supplementary Table 1 - Clinico-pathological characteristics of the overall population.**

Clinico-pathological features of the overall population included in the study.

Abbreviations: Q1-Q3, interquartile range; NA, not available; cT, clinical stage T; cN, clinical stage N; HR, hormone receptors;

| Characteristics                                     |                         | N (%)      | Median (Q1-Q3)   |
|-----------------------------------------------------|-------------------------|------------|------------------|
| <b>Age (years), median (Q1-Q3)</b>                  |                         |            | 51.6 (43.8-60.2) |
| <b>Histology</b>                                    | Ductal carcinoma        | 278 (94.2) |                  |
|                                                     | Lobular carcinoma       | 8 (2.7)    |                  |
|                                                     | Other/NA                | 9 (3.1)    |                  |
| <b>Grading</b>                                      | 1                       | 0          |                  |
|                                                     | 2                       | 99 (33.6)  |                  |
|                                                     | 3                       | 175 (59.3) |                  |
|                                                     | NA                      | 21 (7.1)   |                  |
| <b>Clinical stage - cT</b>                          | 0                       | 1 (0.4)    |                  |
|                                                     | 1                       | 29 (9.8)   |                  |
|                                                     | 2                       | 191 (64.7) |                  |
|                                                     | 3                       | 51 (17.2)  |                  |
|                                                     | 4                       | 21 (7.1)   |                  |
|                                                     | NA                      | 2 (0.8)    |                  |
| <b>Clinical stage – cN</b>                          | Negative                | 127 (43.1) |                  |
|                                                     | Positive                | 168 (56.9) |                  |
| <b>Clinical TNM</b>                                 | I                       | 16 (5.4)   |                  |
|                                                     | II                      | 203 (68.8) |                  |
|                                                     | III                     | 76 (25.8)  |                  |
| <b>Estrogen expression (%) – Median (Q1-Q3)</b>     |                         |            | 25.0 (25.0-88.0) |
| <b>Progesterone expression (%) – Median (Q1-Q3)</b> |                         |            | 1.0 (0.0-40.0)   |
| <b>HR status</b>                                    | Negative (<1%)          | 108 (36.3) |                  |
|                                                     | Positive (≥1%)          | 187 (63.4) |                  |
| <b>Ki67 expression (%) – Median (Q1-Q3)</b>         |                         |            | 33.0 (25.0-50.0) |
| <b>Neoadjuvant treatment</b>                        | Anti-HER2               | 295 (100%) |                  |
|                                                     | Anthracycline-taxane CT | 246 (83.4) |                  |
|                                                     | Taxane-based CT         | 47 (15.9)  |                  |
|                                                     | Other CT                | 2 (0.7)    |                  |
