# Supplementary material for: A Prognostic Model Based on Residual Cancer Burden and Tumor-Infiltrating Lymphocytes on Residual Disease after Neoadjuvant Therapy in HER2+ Breast Cancer
Source: PubMed Central journal article supplement — Clin Cancer Res. 2023 Jul 7;29(17):3429–37. doi: 10.1158/1078-0432.CCR-23-0480 (PMC10472099; doi:10.1158/1078-0432.ccr-23-0480), 2023-07-07
Supplement: ccr-23-0480_supplementary_table_2_suppst2.pdf [file ccr-23-0480_supplementary_table_2_suppst2.pdf]

**Supplementary Table 2 - Representativeness of Study Participants.**

*Representativeness of the population object of the present study.*

*Abbreviations: BC, breast cancer; pCR, pathologic complete response.*

| Cancer type/Subtype/Stage/Condition      | HER2-positive breast cancer (HER2+ BC)                                                                                                                                                                                                                                                                                                                                                                                                                                    |
|------------------------------------------|---------------------------------------------------------------------------------------------------------------------------------------------------------------------------------------------------------------------------------------------------------------------------------------------------------------------------------------------------------------------------------------------------------------------------------------------------------------------------|
| Considerations related to:               |                                                                                                                                                                                                                                                                                                                                                                                                                                                                           |
| Sex                                      | HER2+ BC, as all other subtypes of breast cancer, is a predominantly female disease and is rare in men. Male breast cancer represents only between 0.5 and 1% of all BCs diagnosed each year. HER2+ BC incidence is around 15-20% among all BC subtypes in the overall largely female population. The proportion of male BC patients with HER2+ BC is around 10-15%.                                                                                                      |
| Age                                      | The median age at the time of all BC diagnoses is around 60, while in HER2+ it is closer to 50-55.                                                                                                                                                                                                                                                                                                                                                                        |
| pCR rates                                | pCR rates after neoadjuvant treatment in HER2+ BC ranges from approximately 30 to 50% across studies.                                                                                                                                                                                                                                                                                                                                                                     |
| Overall representativeness of this study | <p>The age distribution of our study is similar to the average age distribution of HER2+ BC in the literature, median age of approximately 50.</p> <p>In our study no gender disparity has been applied in terms of eligibility criteria. However, no male patients have been enrolled, probably due to the extremely low prevalence of male BC within HER2+ phenotype.</p> <p>In our study, pCR rates was almost 35%, thus well comparing with available literature.</p> |
