# Supplementary material for: A Prognostic Model Based on Residual Cancer Burden and Tumor-Infiltrating Lymphocytes on Residual Disease after Neoadjuvant Therapy in HER2+ Breast Cancer
Source: PubMed Central journal article supplement — Clin Cancer Res. 2023 Jul 7;29(17):3429–37. doi: 10.1158/1078-0432.CCR-23-0480 (PMC10472099; doi:10.1158/1078-0432.ccr-23-0480), 2023-07-07
Supplement: ccr-23-0480_supplementary_table_3_suppst3.pdf [file ccr-23-0480_supplementary_table_3_suppst3.pdf]

**Supplementary Table 3** – Multivariate Cox analysis for disease-free survival (DFS) in patients with residual disease (RD) after surgery

Multivariate logistic regression model for disease-free survival (DFS) in patients with residual disease (RD) after surgery including RCB and RD-TILs.

Abbreviations: RCB, residual cancer burden; RD-TILs tumor infiltrating lymphocytes on residual disease; HR, hazard ratio; CI, confidence interval.

| Factors                | HR (95%CI)       | P      |
|------------------------|------------------|--------|
| RCB, cont.             | 2.78 (2.02-3.83) | <0.001 |
| RD-TILs (high vs low)* | 2.72 (1.23-5.99) | 0.013  |

\*Twenty% of RD-TILs was identified as the optimal prognostic cutoff for DFS.

**Combined score RCB+TILs: association with disease-free survival (DFS)**

We calculated the combined score of RCB+TIL from the estimated coefficient of RD-TILs (dichotomous, high vs. low) and the RCB index (continuous) in a bivariate logistic model for DFS: TILs (0=low/1=high)  $\times$  1.001 + RCB (index)  $\times$  1.024. RCB+TIL score was significantly associated with DFS (HR 2.72, 95% CI 2.00-3.70,  $p < 0.001$ ), with a decreasing probability of DFS with increasing RCB-TIL levels.
